# Supplementary material for: Differences in Measured and Self-Categorized Food Security Status and Related Coping Strategies among College Students
Source: MDPI journal article supplement (doi:10.3390/nu14173569), 2022-08-30
Supplement: s1 [file s1]

Supplemental Table S3. Differences in Coping Strategies by Self-Categorized Food Security Status among Students AFSSM-Measured as Food Insecure

| Variable                                           | Total<br>n (%)<br>n=401 | AFSSM-Measured FI<br>+ Self-Categorized FS<br>n = 232 (57.9%) | AFSSM-Measured<br>FI + Self-<br>Categorized FI<br>n = 169 (42.1%) | p-value*          |
|----------------------------------------------------|-------------------------|---------------------------------------------------------------|-------------------------------------------------------------------|-------------------|
| <b>Coping Strategies Saving Subscale</b>           |                         |                                                               |                                                                   |                   |
| <b>Took fewer classes</b>                          | n=399                   |                                                               |                                                                   | N/A               |
| Often                                              | 10 (2.5)                | 4 (1.7)                                                       | 6 (3.6)                                                           |                   |
| Sometimes                                          | 35 (8.8)                | 13 (5.6)                                                      | 22 (13.2)                                                         |                   |
| Never                                              | 354 (88.7)              | 215 (92.7)                                                    | 139 (83.2)                                                        |                   |
| <b>Used less utilities (electricity, water)</b>    | n=401                   |                                                               |                                                                   | <b>0.004</b>      |
| Often                                              | 124 (30.9)              | 58 (25.0)                                                     | 66 (39.1)                                                         |                   |
| Sometimes                                          | 111 (27.7)              | 64 (27.6)                                                     | 47 (27.8)                                                         |                   |
| Never                                              | 166 (41.4)              | 110 (47.4)                                                    | 56 (33.1)                                                         |                   |
| <b>Shared rent with others</b>                     | n=400                   |                                                               |                                                                   | 0.407             |
| Often                                              | 167 (41.8)              | 90 (39.0)                                                     | 77 (45.5)                                                         |                   |
| Sometimes                                          | 74 (18.5)               | 44 (19.0)                                                     | 30 (17.8)                                                         |                   |
| Never                                              | 159 (39.8)              | 97 (42.0)                                                     | 62 (36.7)                                                         |                   |
| <b>Planned menus before buying food</b>            | n=400                   |                                                               |                                                                   | 0.360             |
| Often                                              | 254 (63.5)              | 140 (60.6)                                                    | 114 (67.4)                                                        |                   |
| Sometimes                                          | 108 (27.0)              | 68 (29.4)                                                     | 40 (23.7)                                                         |                   |
| Never                                              | 38 (9.5)                | 23 (10.0)                                                     | 15 (8.9)                                                          |                   |
| <b>Cut out food coupons</b>                        | n=400                   |                                                               |                                                                   | 0.082             |
| Often                                              | 176 (44.0)              | 91 (39.4)                                                     | 85 (50.3)                                                         |                   |
| Sometimes                                          | 155 (38.8)              | 95 (41.1)                                                     | 60 (35.5)                                                         |                   |
| Never                                              | 69 (17.2)               | 45 (19.5)                                                     | 24 (14.2)                                                         |                   |
| <b>Saved money on meds or medical appointments</b> | n=400                   |                                                               |                                                                   | <b>&lt; 0.001</b> |
| Often                                              | 110 (27.5)              | 55 (23.8)                                                     | 55 (32.5)                                                         |                   |
| Sometimes                                          | 91 (22.8)               | 41 (17.8)                                                     | 50 (29.6)                                                         |                   |
| Never                                              | 199 (49.8)              | 135 (58.4)                                                    | 64 (37.9)                                                         |                   |

|                                                                     |            |            |            |                   |
|---------------------------------------------------------------------|------------|------------|------------|-------------------|
| <b>Stretched food to last longer</b>                                | n=401      |            |            | <b>0.017</b>      |
| Often                                                               | 224 (55.9) | 117 (50.5) | 107 (63.3) |                   |
| Sometimes                                                           | 146 (36.4) | 98 (42.2)  | 48 (28.4)  |                   |
| Never                                                               | 31 (7.7)   | 17 (7.3)   | 14 (8.3)   |                   |
| <b>Shared groceries/meals with roommates</b>                        | n=401      |            |            | <b>0.583</b>      |
| Often                                                               | 144 (35.9) | 86 (37.1)  | 58 (34.3)  |                   |
| Sometimes                                                           | 133 (33.2) | 79 (34.0)  | 54 (32.0)  |                   |
| Never                                                               | 124 (30.9) | 67 (28.9)  | 57 (33.7)  |                   |
| <b>Save food for emergencies</b>                                    | n=401      |            |            | <b>&lt; 0.001</b> |
| Often                                                               | 92 (22.9)  | 38 (16.4)  | 54 (32.0)  |                   |
| Sometimes                                                           | 153 (38.2) | 89 (38.3)  | 64 (37.9)  |                   |
| Never                                                               | 156 (38.9) | 105 (45.3) | 51 (30.1)  |                   |
| <b>Coping Strategies Support Subscale</b>                           |            |            |            |                   |
| <b>Participated in paid research study to buy food</b>              | n=401      |            |            | <b>0.088</b>      |
| Often                                                               | 40 (10.0)  | 17 (7.3)   | 23 (13.6)  |                   |
| Sometimes                                                           | 84 (20.9)  | 53 (22.8)  | 31 (18.4)  |                   |
| Never                                                               | 277 (69.1) | 162 (69.9) | 115 (68.0) |                   |
| <b>Borrowed money from family/friends</b>                           | n=401      |            |            | <b>0.242</b>      |
| Often                                                               | 62 (15.5)  | 30 (12.9)  | 32 (19.0)  |                   |
| Sometimes                                                           | 175 (43.6) | 106 (45.7) | 69 (40.8)  |                   |
| Never                                                               | 164 (40.9) | 96 (41.4)  | 68 (40.2)  |                   |
| <b>Attended functions where there was free food</b>                 | n=401      |            |            | <b>0.365</b>      |
| Often                                                               | 187 (46.6) | 102 (44.0) | 85 (50.3)  |                   |
| Sometimes                                                           | 187 (46.6) | 112 (48.3) | 75 (44.4)  |                   |
| Never                                                               | 27 (6.8)   | 18 (7.7)   | 9 (5.3)    |                   |
| <b>Obtained food from food bank or pantry</b>                       | n=401      |            |            | <b>0.049</b>      |
| Often                                                               | 37 (9.2)   | 23 (9.9)   | 14 (8.3)   |                   |
| Sometimes                                                           | 77 (19.2)  | 35 (15.1)  | 42 (24.9)  |                   |
| Never                                                               | 287 (71.6) | 174 (75.0) | 113 (66.8) |                   |
| <b>Participated in food assistance program<br/>(e.g. SNAP; WIC)</b> | n=401      |            |            | <b>0.912</b>      |
| Often                                                               | 12 (3.0)   | 7 (3.0)    | 5 (3.0)    |                   |

|                                                                |            |            |            |         |
|----------------------------------------------------------------|------------|------------|------------|---------|
| Sometimes                                                      | 42 (10.5)  | 23 (9.9)   | 19 (11.2)  |         |
| Never                                                          | 347 (86.5) | 202 (87.1) | 145 (85.8) |         |
| <b>Ate meals at places where you pay what you can</b>          | n=401      |            |            | 0.955   |
| Often                                                          | 31 (7.7)   | 18 (7.8)   | 13 (7.7)   |         |
| Sometimes                                                      | 57 (14.2)  | 34 (14.6)  | 23 (13.6)  |         |
| Never                                                          | 313 (78.1) | 180 (77.6) | 133 (78.7) |         |
| <b>Joined a group where free meals are provided</b>            | n=401      |            |            | 0.868   |
| Often                                                          | 24 (6.0)   | 13 (5.6)   | 11 (6.5)   |         |
| Sometimes                                                      | 75 (18.7)  | 45 (19.4)  | 30 (17.8)  |         |
| Never                                                          | 302 (75.3) | 174 (75.0) | 128 (75.7) |         |
| <b>Visited family on weekends to bring food back to school</b> | n=401      |            |            | 0.749   |
| Often                                                          | 79 (19.7)  | 44 (19.0)  | 35 (20.7)  |         |
| Sometimes                                                      | 146 (36.4) | 88 (37.9)  | 58 (34.3)  |         |
| Never                                                          | 176 (43.9) | 100 (43.1) | 76 (45.0)  |         |
| <b>Held ≥1 part- or full-time jobs</b>                         | n=401      |            |            | 0.101   |
| Often                                                          | 124 (30.9) | 71 (30.6)  | 53 (31.4)  |         |
| Sometimes                                                      | 97 (24.2)  | 48 (20.7)  | 49 (29.0)  |         |
| Never                                                          | 180 (44.9) | 113 (48.7) | 67 (39.6)  |         |
| <b>Used credit card to buy food</b>                            | n=400      |            |            | 0.317   |
| Often                                                          | 148 (37.0) | 79 (34.2)  | 69 (40.8)  |         |
| Sometimes                                                      | 87 (21.7)  | 55 (23.8)  | 32 (18.9)  |         |
| Never                                                          | 165 (41.3) | 97 (42.0)  | 68 (40.3)  |         |
| <b>Coping Strategies Access Subscale</b>                       |            |            |            |         |
| <b>Ate less healthy meals to eat more food</b>                 | n=401      |            |            | < 0.001 |
| Often                                                          | 207 (51.6) | 92 (39.7)  | 115 (68.1) |         |
| Sometimes                                                      | 150 (37.4) | 105 (45.2) | 45 (26.6)  |         |
| Never                                                          | 44 (11.0)  | 35 (15.1)  | 9 (5.3)    |         |
| <b>Took food home from on-campus dining hall</b>               | n=399      |            |            | 0.208   |
| Often                                                          | 71 (17.8)  | 46 (20.0)  | 25 (14.8)  |         |
| Sometimes                                                      | 102 (25.6) | 62 (27.0)  | 40 (23.7)  |         |
| Never                                                          | 226 (56.5) | 122 (53.0) | 104 (61.5) |         |

|                                             |            |            |            |         |
|---------------------------------------------|------------|------------|------------|---------|
| <b>Obtained food from dumpster or trash</b> | n=398      |            |            | N/A     |
| Often                                       | 2 (0.5)    | 1 (0.4)    | 1 (0.6)    |         |
| Sometimes                                   | 11 (2.8)   | 7 (3.1)    | 4 (2.4)    |         |
| Never                                       | 385 (96.7) | 221 (96.5) | 164 (97.0) |         |
| <b>Purchased cheap, processed food</b>      | n=398      |            |            | < 0.001 |
| Often                                       | 201 (50.5) | 88 (38.3)  | 113 (67.3) |         |
| Sometimes                                   | 161 (40.5) | 114 (49.6) | 47 (28.0)  |         |
| Never                                       | 36 (9.0)   | 28 (12.1)  | 8 (4.7)    |         |
| <b>Bartered services/items to buy food</b>  | n=400      |            |            | 0.271   |
| Often                                       | 17 (4.3)   | 7 (3.0)    | 10 (5.9)   |         |
| Sometimes                                   | 47 (11.7)  | 25 (10.8)  | 22 (13.0)  |         |
| Never                                       | 336 (84.0) | 199 (86.2) | 137 (81.1) |         |
| <b>Coping Strategies Selling Subscale</b>   |            |            |            |         |
| <b>Sold textbooks</b>                       | n=398      |            |            | 0.560   |
| Often                                       | 45 (11.3)  | 24 (10.5)  | 21 (12.4)  |         |
| Sometimes                                   | 80 (20.1)  | 43 (18.8)  | 37 (21.9)  |         |
| Never                                       | 273 (68.6) | 162 (70.7) | 111 (65.7) |         |
| <b>Sold personal possessions</b>            | n=400      |            |            | 0.005   |
| Often                                       | 41 (10.3)  | 16 (6.9)   | 25 (14.8)  |         |
| Sometimes                                   | 110 (27.5) | 57 (24.7)  | 53 (31.4)  |         |
| Never                                       | 249 (62.3) | 158 (68.4) | 91 (53.8)  |         |
| <b>Sold blood/plasma to buy food</b>        | n=399      |            |            | 0.094   |
| Often                                       | 21 (5.3)   | 9 (3.9)    | 12 (7.2)   |         |
| Sometimes                                   | 35 (8.7)   | 16 (6.9)   | 19 (11.3)  |         |
| Never                                       | 343 (86.0) | 206 (89.2) | 137 (81.5) |         |
| <b>Sold sperm/eggs to buy food</b>          | n=398      |            |            | N/A     |
| Often                                       | 1 (0.3)    | 1 (0.4)    | 0          |         |
| Sometimes                                   | 6 (1.5)    | 5 (2.2)    | 1 (0.6)    |         |
| Never                                       | 391 (98.2) | 223 (97.4) | 168 (99.4) |         |

---

\*Significantly different at p-value <0.05 with  $\chi^2$  test.
