# Supplementary material for: Differences in Measured and Self-Categorized Food Security Status and Related Coping Strategies among College Students
Source: MDPI journal article supplement (doi:10.3390/nu14173569), 2022-08-30
Supplement: s1 [file s1]

Supplemental Table S2. Differences in Total Coping Strategies Scale Scores by Self-Categorized Food Security Status among Students AFSSM-Measured as Having Low and Very Low Food Security

| Variable                                  | Total<br>n (%) | AFSSM-<br>Measured Low<br>FS + Self-<br>Categorized<br>FS | AFSSM-<br>Measured Low<br>FS + Self-<br>Categorized FI | AFSSM-<br>Measured Very<br>Low FS + Self-<br>Categorized FS | AFSSM-<br>Measured Very<br>Low FS + Self-<br>Categorized FI | p-value*         |
|-------------------------------------------|----------------|-----------------------------------------------------------|--------------------------------------------------------|-------------------------------------------------------------|-------------------------------------------------------------|------------------|
| <b>Coping Strategies Overall Score by</b> | n=388          | n=117                                                     | n=46                                                   | n=106                                                       | n=119                                                       | <b>&lt;0.001</b> |
| <b>Quartiles</b>                          |                |                                                           |                                                        |                                                             |                                                             |                  |
| Score of 28.0-42.0 (bottom 25%)           | 101 (26.0)     | 43 (36.8) <sup>a</sup>                                    | 12 (26.1) <sup>a</sup>                                 | 27 (25.5) <sup>a</sup>                                      | 19 (16.0) <sup>b</sup>                                      |                  |
| Score of 42.1-47.0                        | 96 (24.7)      | 38 (32.5)                                                 | 15 (32.6)                                              | 20 (18.9)                                                   | 23 (19.3)                                                   |                  |
| Score of 47.1-53.0                        | 107 (27.7)     | 25 (21.4)                                                 | 12 (26.1)                                              | 35 (33.0)                                                   | 35 (29.4)                                                   |                  |
| Score of 53.1-84.0 (top 25%)              | 84 (21.6)      | 11 (9.3) <sup>a</sup>                                     | 7 (15.2) <sup>a</sup>                                  | 24 (22.6) <sup>a</sup>                                      | 42 (35.3) <sup>b</sup>                                      |                  |

\*Significantly different at p-value <0.05 with  $\chi^2$  test ( $\chi^2$  (9, n=388)= 38.9, p<0.001). Each subscript letter denotes a subset of Food Security Status categories whose column proportions do not differ significantly from each other at p=0.002; Measured Low FS + Self-Identified FS = Measured as having low food security and self-identified as food secure (low FS-SFS); Measured Low FS + Self-Identified FI = Measured as having low food security and self-identified as food insecure (low FS-SFI); Measured Very Low FS + Self-Identified FS = Measured as having very low food security and self-identified as food secure (very low FS-SFS); Measured Very Low FS + Self-Identified FI = Measured as having very low food security and self-identified as food insecure (very low FS-SFI). Bonferroni correction for post-hoc analysis: 0.05/24 = 0.002
