# Supplementary material for: Differences in Measured and Self-Categorized Food Security Status and Related Coping Strategies among College Students
Source: MDPI journal article supplement (doi:10.3390/nu14173569), 2022-08-30
Supplement: s1 [file s1]

Supplemental Table S1. Differences in Question Responses to USDA AFSSM by Self-Categorized Food Security Status among Students AFSSM-Measured as Food Insecure

| Variable                                                                                                                                      | AFSSM-Measured |                 | AFSSM-Measured  |  | p-value*          |
|-----------------------------------------------------------------------------------------------------------------------------------------------|----------------|-----------------|-----------------|--|-------------------|
|                                                                                                                                               | Total          | FI + Self-      | FI + Self-      |  |                   |
|                                                                                                                                               | n (%)          | Categorized FS  | Categorized FI  |  |                   |
|                                                                                                                                               | n=401          | n = 232 (57.9%) | n = 169 (42.1%) |  |                   |
| <b>Question HH1: Which of these statements best describes the food eaten in your household in the last 12 months:</b>                         |                |                 |                 |  | <b>&lt; 0.001</b> |
|                                                                                                                                               | n=401          |                 |                 |  |                   |
| Enough of the kinds of food we want to eat                                                                                                    | 99 (24.7)      | 80 (34.5)       | 19 (11.2)       |  |                   |
| Enough but not always the kinds of food we want                                                                                               | 232 (57.9)     | 130 (56.0)      | 102 (60.4)      |  |                   |
| Sometimes not enough to eat                                                                                                                   | 62 (15.5)      | 21 (9.1)        | 41 (24.3)       |  |                   |
| Often not enough to eat                                                                                                                       | 8 (2.0)        | 1 (0.4)         | 7 (4.1)         |  |                   |
| <b>Question HH2: “I worried whether my food would run out before I got money to buy more.”</b>                                                |                |                 |                 |  | <b>&lt; 0.001</b> |
|                                                                                                                                               | n=400          |                 |                 |  |                   |
| Often true                                                                                                                                    | 85 (21.3)      | 30 (13.0)       | 55 (32.5)       |  |                   |
| Sometimes true                                                                                                                                | 254 (63.5)     | 157 (68.0)      | 97 (57.4)       |  |                   |
| Never true                                                                                                                                    | 61 (15.3)      | 44 (19.0)       | 17 (10.1)       |  |                   |
| <b>Question HH3: “The food that I bought just didn’t last, and I didn’t have money to get more.”</b>                                          |                |                 |                 |  | <b>&lt; 0.001</b> |
|                                                                                                                                               | n=397          |                 |                 |  |                   |
| Often true                                                                                                                                    | 54 (13.6)      | 19 (8.3)        | 35 (20.8)       |  |                   |
| Sometimes true                                                                                                                                | 225 (56.7)     | 125 (54.6)      | 100 (59.5)      |  |                   |
| Never true                                                                                                                                    | 118 (29.7)     | 85 (37.1)       | 33 (19.7)       |  |                   |
| <b>Question HH4: “I couldn’t afford to eat balanced meals.”</b>                                                                               |                |                 |                 |  | <b>&lt; 0.001</b> |
|                                                                                                                                               | n=401          |                 |                 |  |                   |
| Often true                                                                                                                                    | 162 (40.4)     | 67 (28.9)       | 95 (56.2)       |  |                   |
| Sometimes true                                                                                                                                | 201 (50.1)     | 136 (58.6)      | 65 (38.5)       |  |                   |
| Never true                                                                                                                                    | 38 (9.5)       | 29 (12.5)       | 9 (5.3)         |  |                   |
| <b>Question AD1: In the last 12 months, did you ever cut the size of your meals or skip meals because there wasn’t enough money for food?</b> |                |                 |                 |  | <b>0.009</b>      |
|                                                                                                                                               | n=400          |                 |                 |  |                   |
| Yes                                                                                                                                           | 343 (85.8)     | 189 (81.8)      | 154 (91.1)      |  |                   |

|                                                                                                                                        |            |            |            |                   |
|----------------------------------------------------------------------------------------------------------------------------------------|------------|------------|------------|-------------------|
| No                                                                                                                                     | 57 (14.2)  | 42 (18.2)  | 15 (8.9)   |                   |
| <b>Question AD1a: If yes above, how often did this happen?</b>                                                                         | n=343      |            |            | <b>&lt; 0.001</b> |
| Almost every month                                                                                                                     | 97 (28.3)  | 33 (17.5)  | 64 (41.5)  |                   |
| Some months but not every month                                                                                                        | 149 (43.4) | 89 (47.1)  | 60 (39.0)  |                   |
| Only 1 or 2 months                                                                                                                     | 97 (28.3)  | 67 (35.4)  | 30 (19.5)  |                   |
| <b>Question AD2: In the last 12 months, did you ever eat less than you felt you should because there wasn't enough money for food?</b> | n=400      |            |            | <b>&lt; 0.001</b> |
| Yes                                                                                                                                    | 320 (80.0) | 171 (74.0) | 149 (88.2) |                   |
| No                                                                                                                                     | 80 (20.0)  | 60 (26.0)  | 20 (11.8)  |                   |
| <b>Question AD3: In the last 12 months, were you ever hungry but didn't eat because there wasn't enough money for food?</b>            | n=397      |            |            | <b>0.02</b>       |
| Yes                                                                                                                                    | 261 (65.7) | 141 (61.0) | 120 (72.3) |                   |
| No                                                                                                                                     | 136 (34.3) | 90 (39.0)  | 46 (27.7)  |                   |
| <b>Question AD4: In the last 12 months, did you lose weight because there wasn't enough money for food?</b>                            | n=399      |            |            | 0.20              |
| Yes                                                                                                                                    | 140 (35.1) | 75 (32.5)  | 65 (38.7)  |                   |
| No                                                                                                                                     | 259 (64.9) | 156 (67.5) | 103 (61.3) |                   |
| <b>Question AD5: In the last 12 months, did you ever not eat for a whole day because there wasn't enough money for food?</b>           | n=381      |            |            | <b>0.05</b>       |
| Yes                                                                                                                                    | 59 (15.5)  | 27 (12.3)  | 32 (19.8)  |                   |
| No                                                                                                                                     | 322 (84.5) | 192 (87.7) | 130 (80.2) |                   |
| <b>Question AD5a: If yes above, how often did this happen?</b>                                                                         | n=58       |            |            | 0.10              |
| Almost every month                                                                                                                     | 13 (22.4)  | 3 (11.1)   | 10 (32.3)  |                   |
| Some months but not every month                                                                                                        | 29 (50.0)  | 14 (51.9)  | 15 (48.4)  |                   |
| Only 1 or 2 months                                                                                                                     | 16 (27.6)  | 10 (37.0)  | 6 (19.3)   |                   |

\*Significantly different at p-value <0.05 with  $\chi^2$  test. HH1:  $\chi^2$  (3, n=401)=43.1, p<0.001; HH2:  $\chi^2$  (2, n=400)=24.5, p<0.001; HH3:  $\chi^2$  (2, n=397)=21.6, p<0.001; HH4:  $\chi^2$  (2, n=401)=31.3, p<0.001; AD1:  $\chi^2$  (1, n=400)=6.9, p=0.009; AD1a:  $\chi^2$  (2, n=343)=26.4, p<0.001; AD2:  $\chi^2$  (1, n=400)=12.2, p<0.001; AD3:  $\chi^2$  (1, n=397)=5.4, p=0.02; AD5:  $\chi^2$  (1, n=381)=3.9, p=0.05.
